# Supplementary material for: Naa50/San-dependent N-terminal acetylation of Scc1 is potentially important for sister chromatid cohesion
Source: PubMed Central journal article supplement (PMC5171793; doi:10.1038/srep39118), 2016-12-20
Supplement: srep39118-s17.pdf [file srep39118-s17.pdf]

**Naa50/San-dependent N-terminal acetylation of Scc1 is potentially important for sister chromatid cohesion.**

Ana L. Ribeiro<sup>1,2</sup>, Rui D. Silva<sup>1,2</sup>, Håvard Foyn<sup>4</sup>, Margarida N. Tiago<sup>1,2</sup>, Om S. Rathore<sup>1,2</sup>, Thomas Arnesen<sup>4,5</sup>, Rui Gonçalo Martinho<sup>1,2,3,#</sup>.

**Supplementary Information:**

**Class 1**

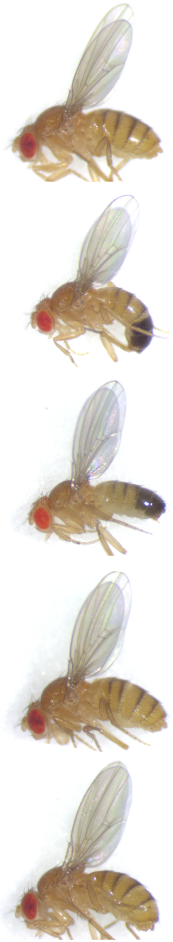

**Class 2**

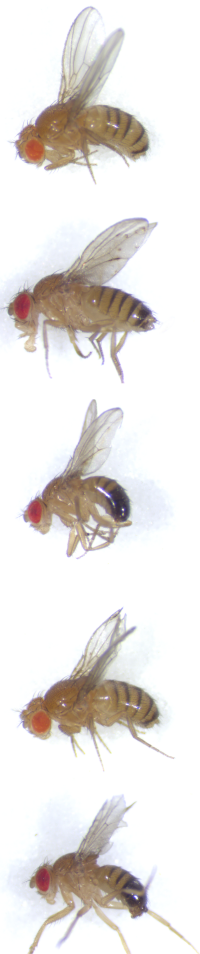

**Class 3**

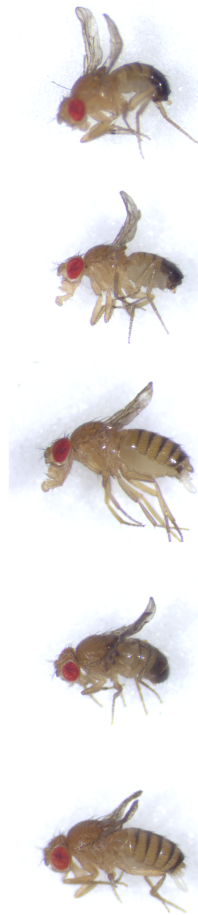

**Class 4**

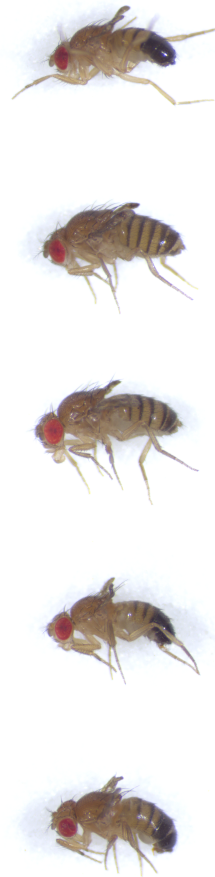

**Class 5**

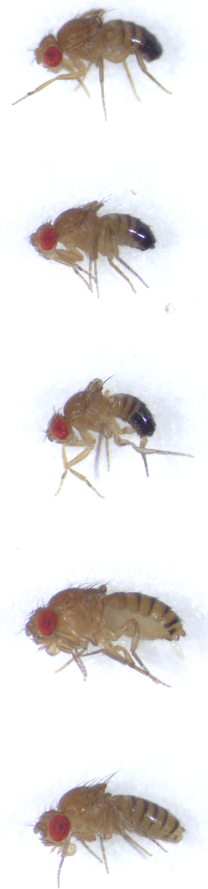



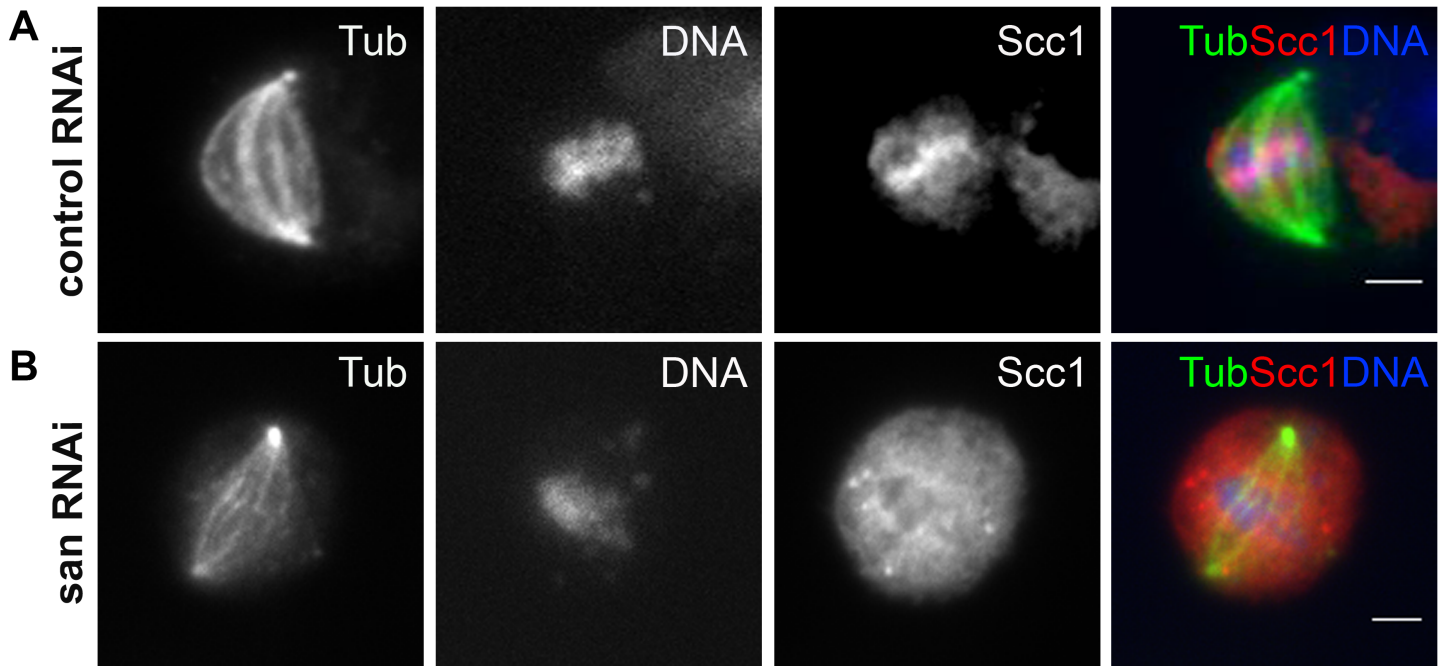

**C** Cohesins protein levels

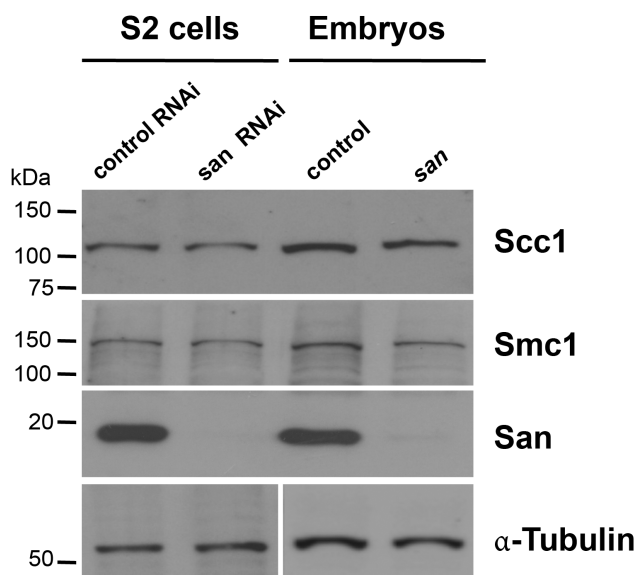

**D** Scc1 chromosomal localization during prometaphase/metaphase

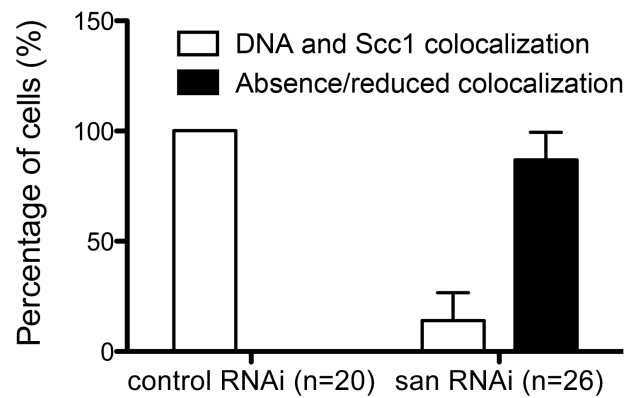

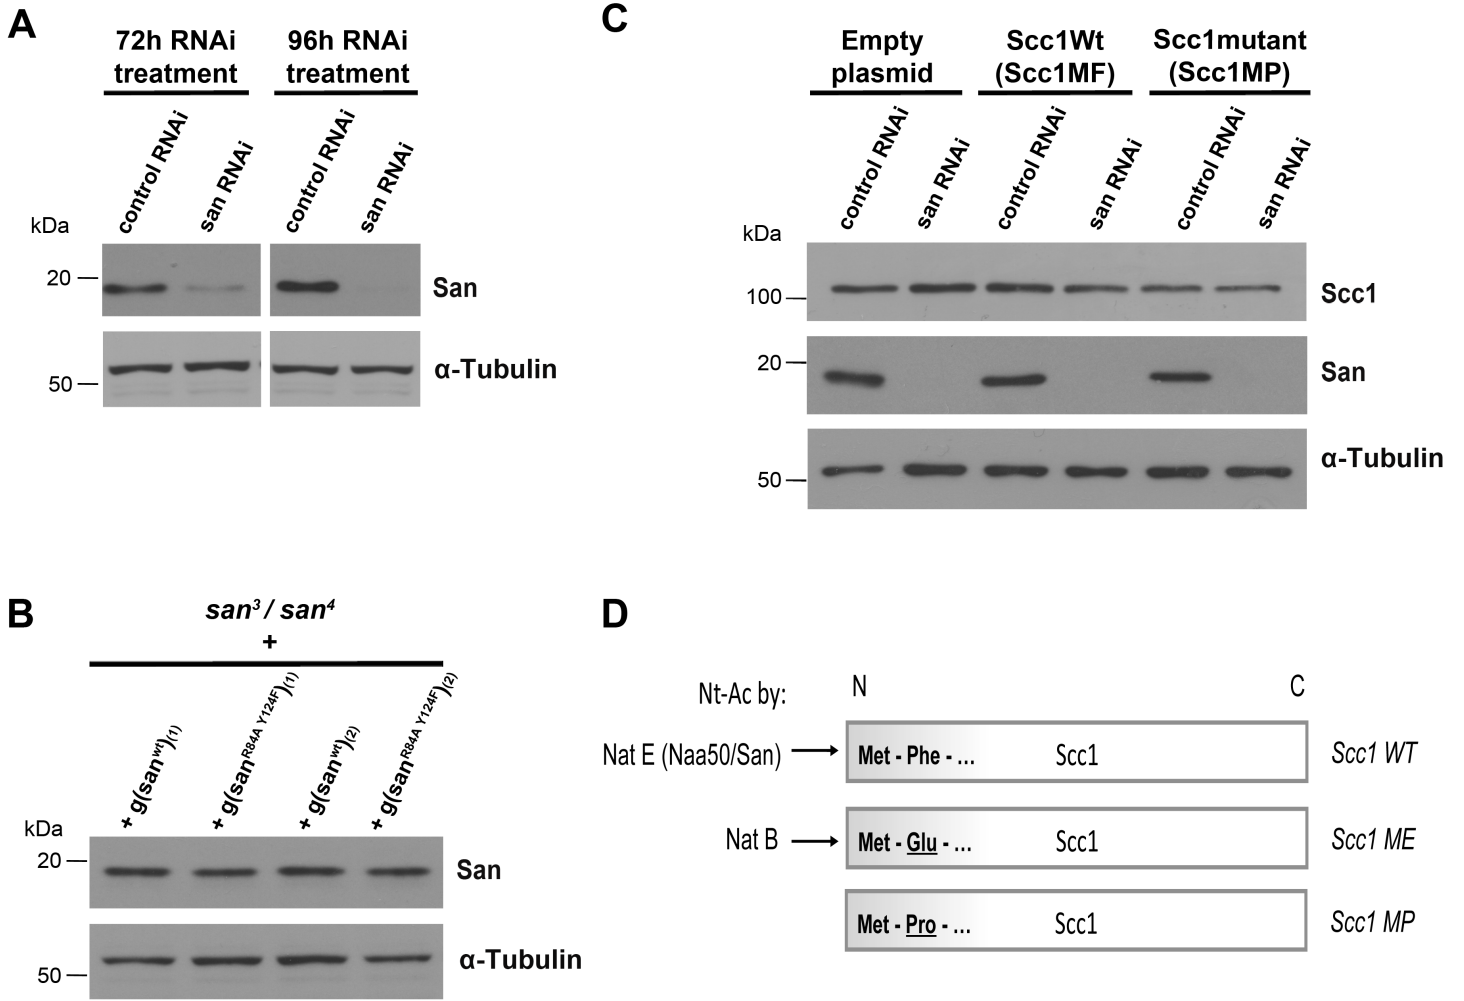

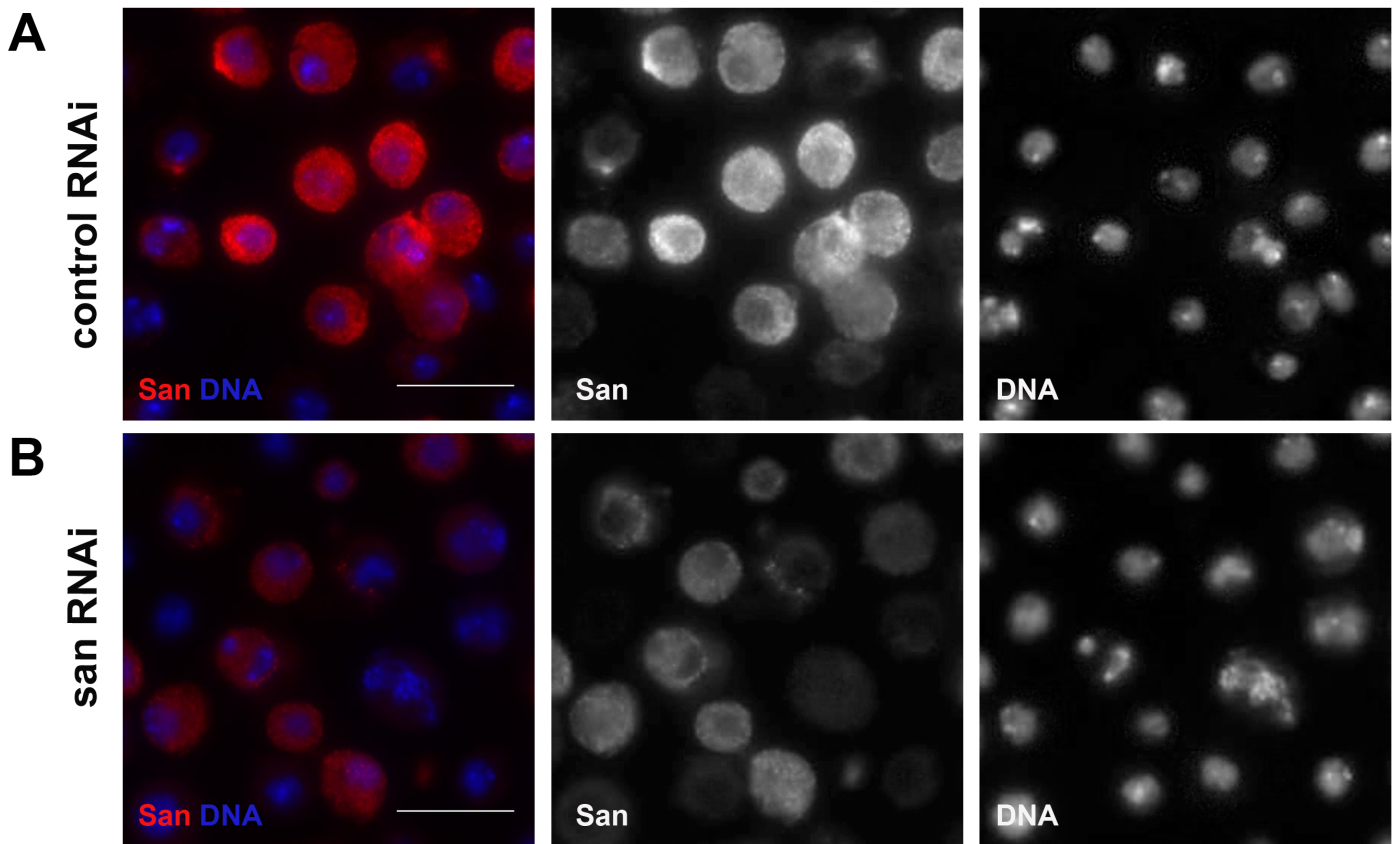

**A**

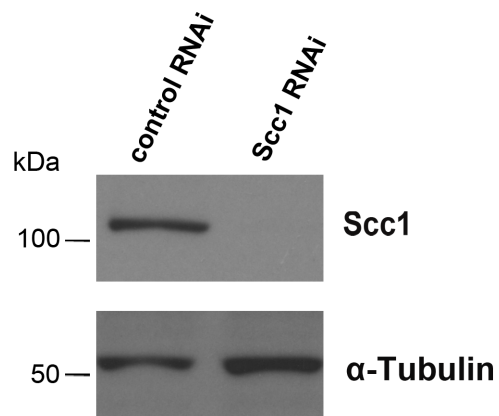

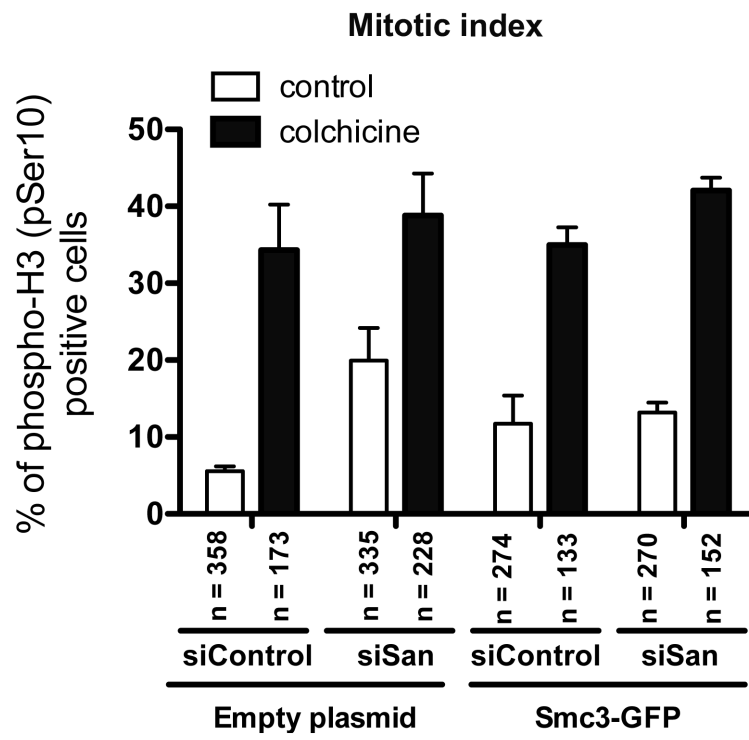

Figure 6 Dalmatian

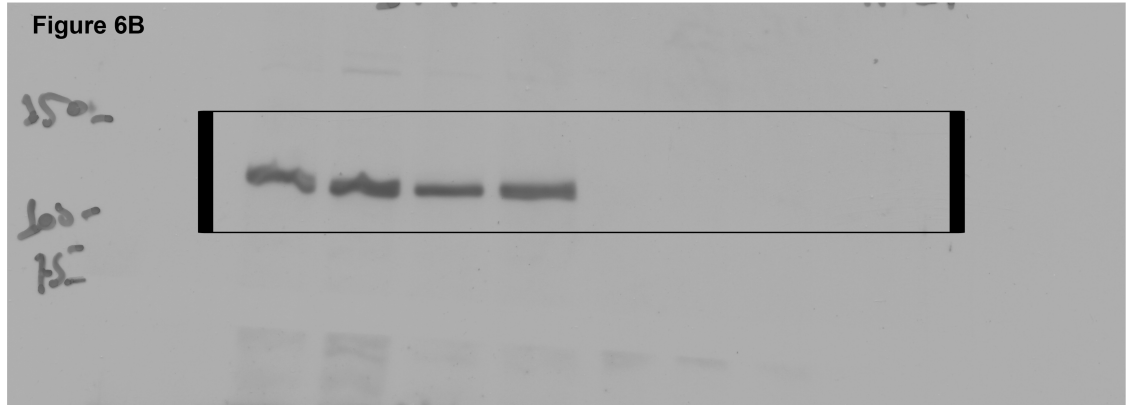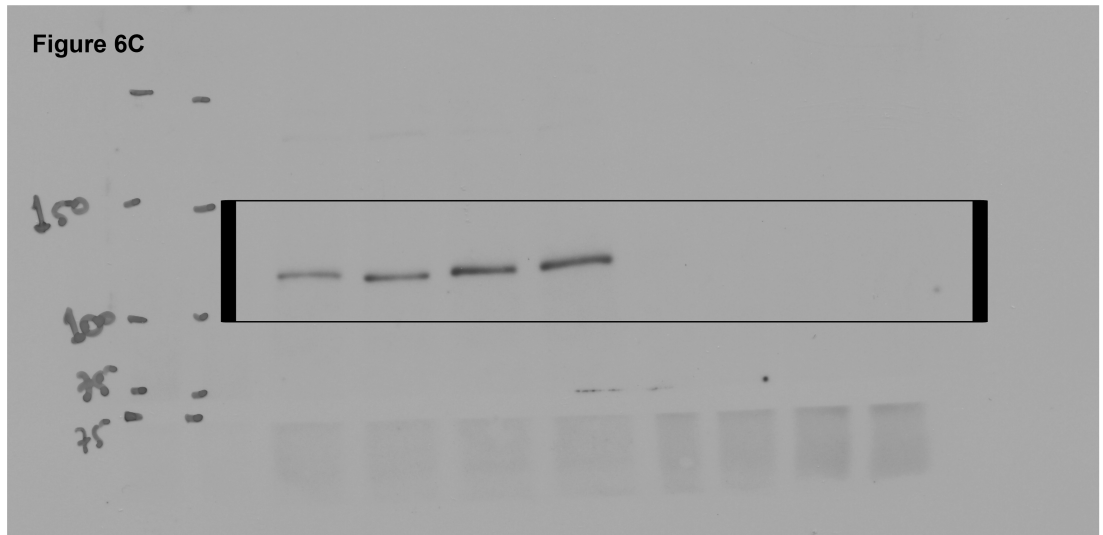

Figure 6B

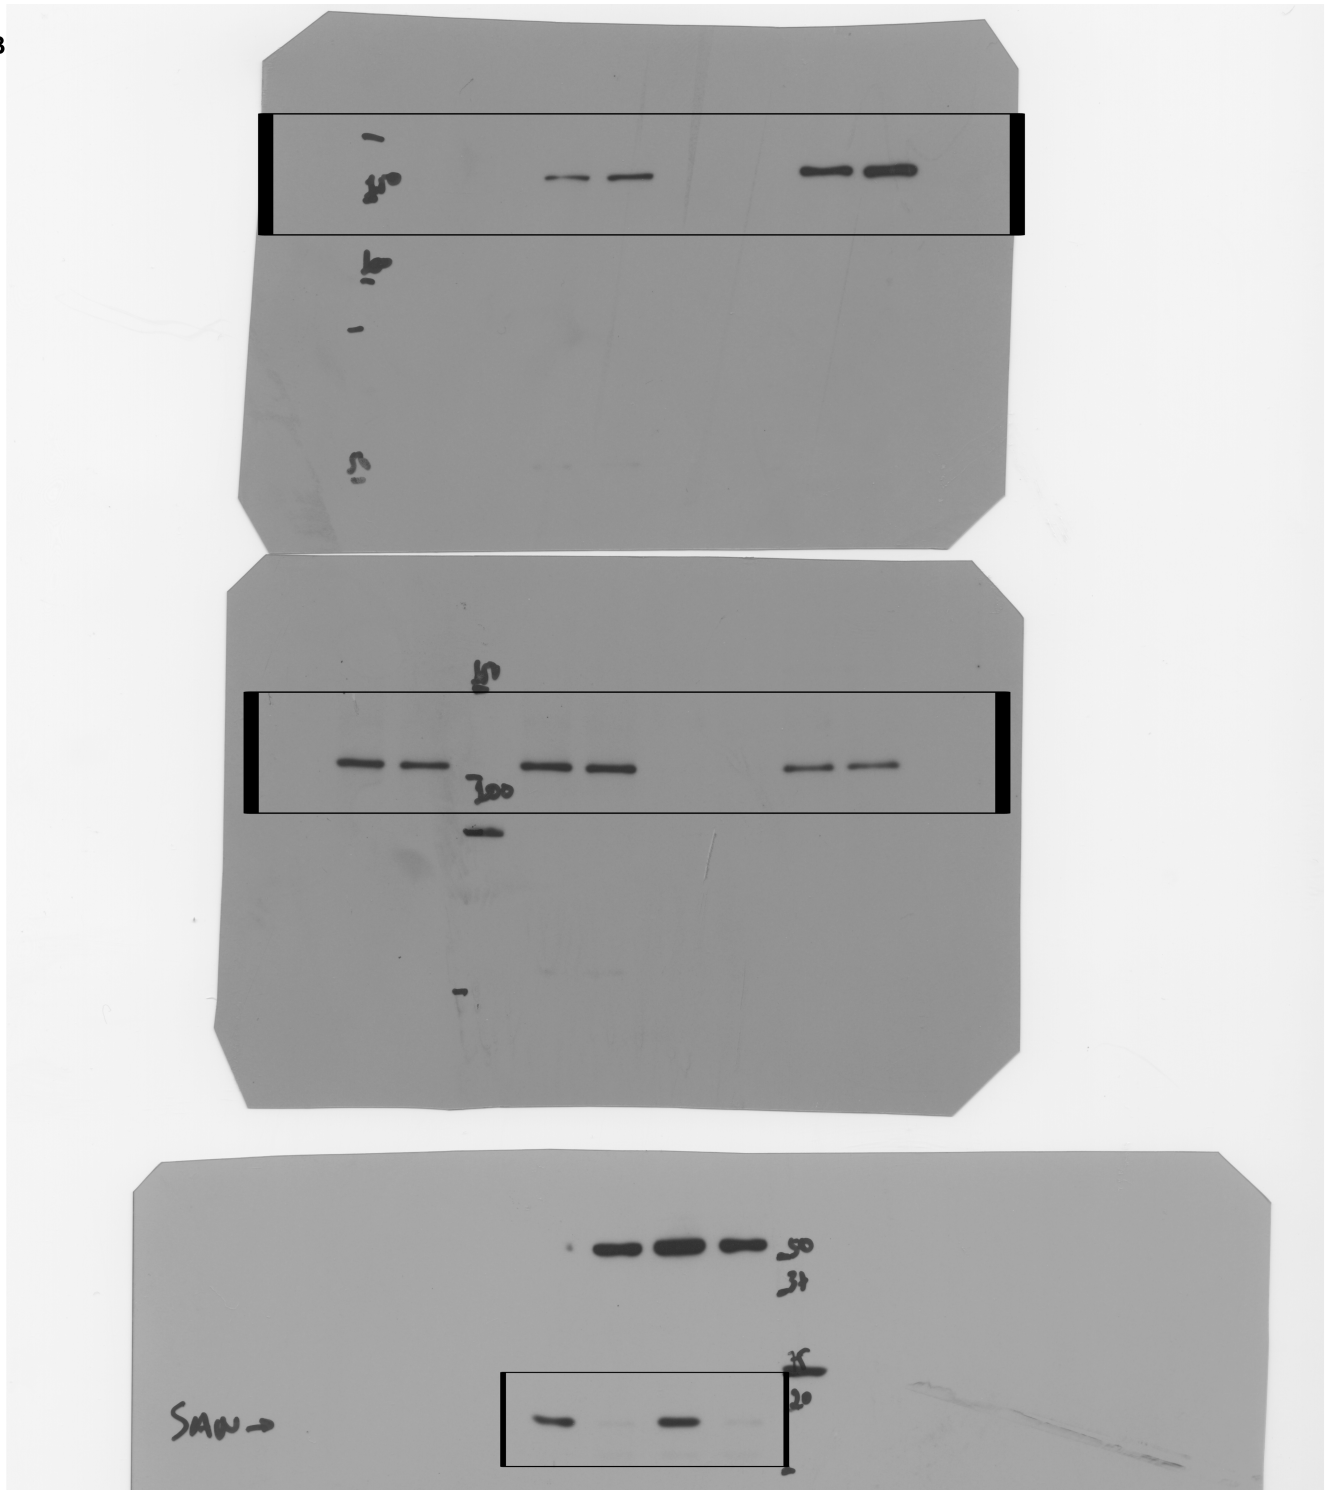

Figure 6C

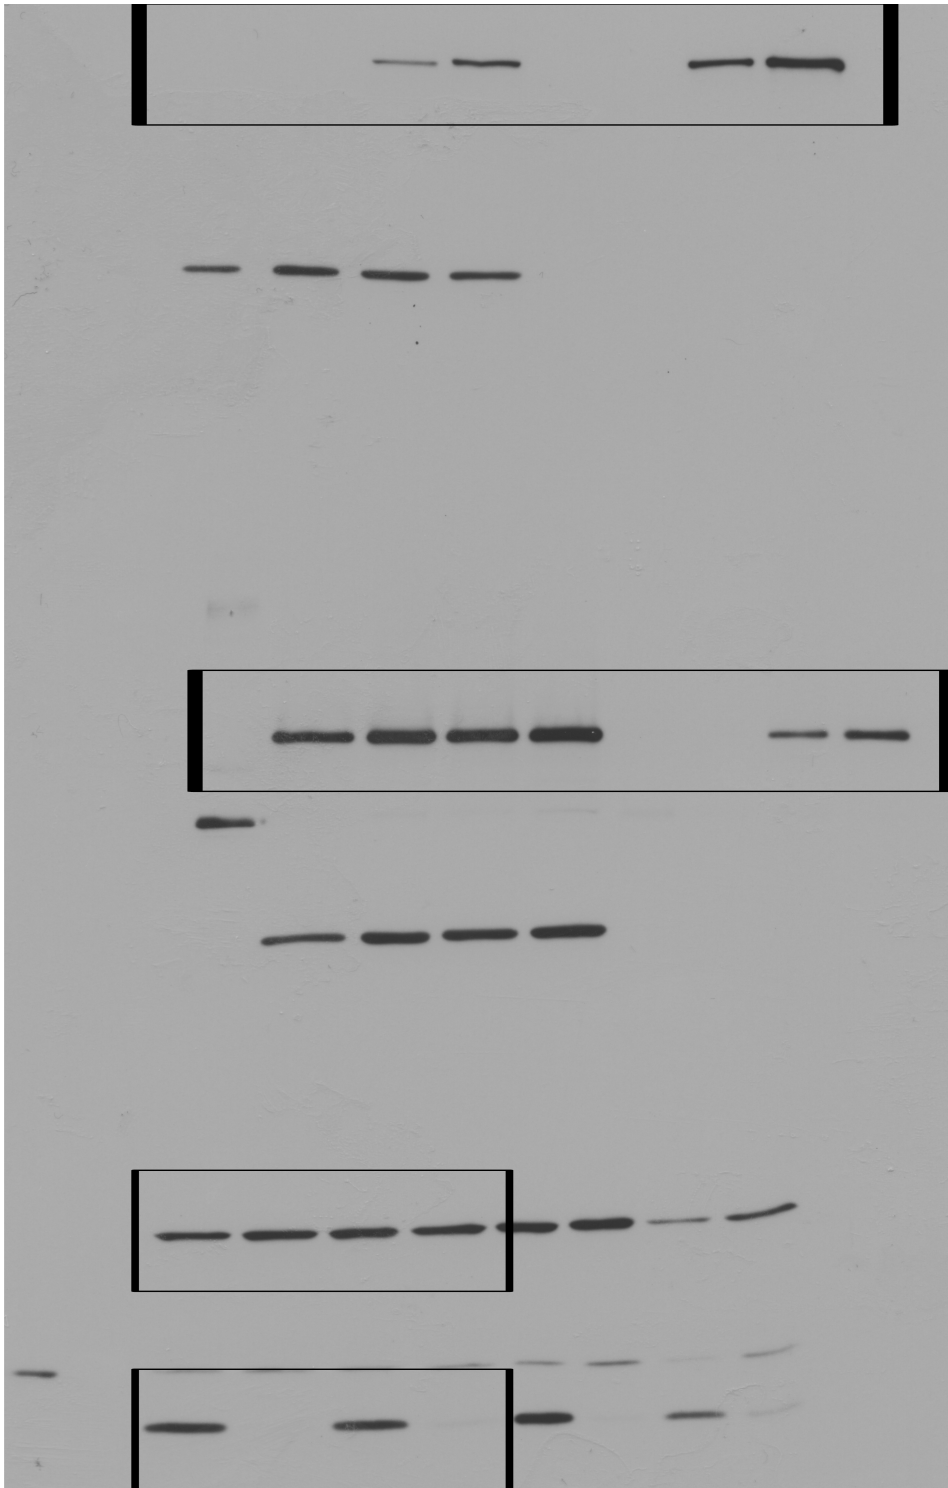



Supplementary  
Fig.2C

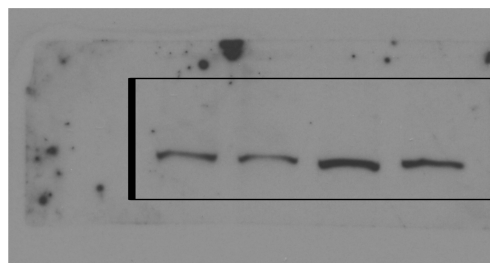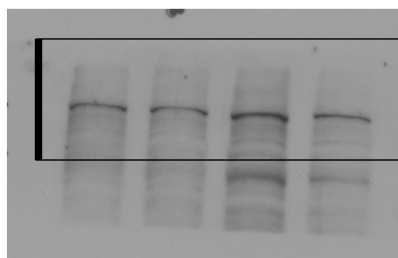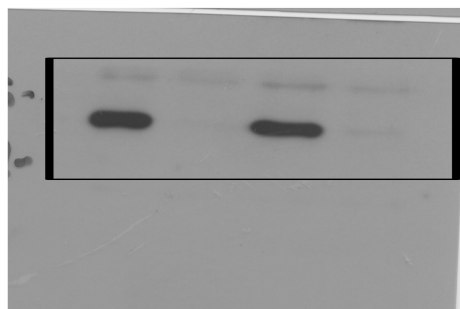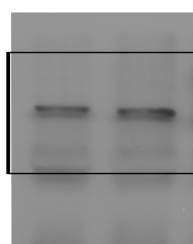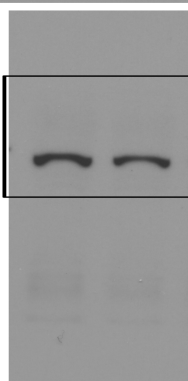

Supplementary  
Fig.3A

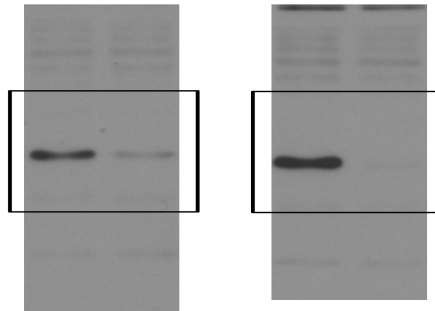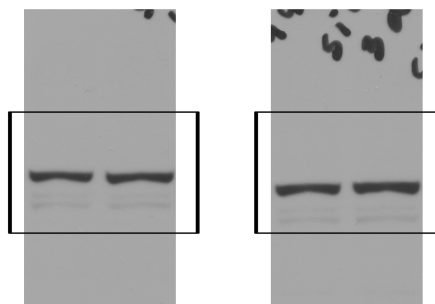

Supplementary  
Fig. 3B

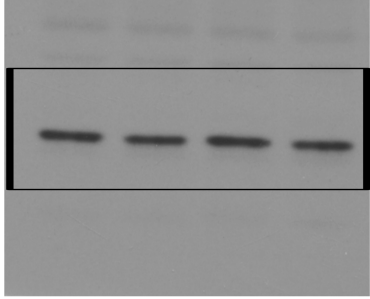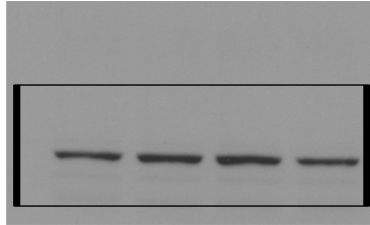

Supplementary  
Fig. 3C

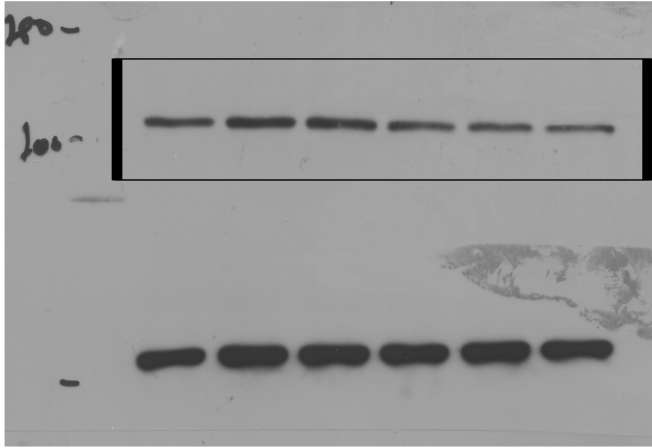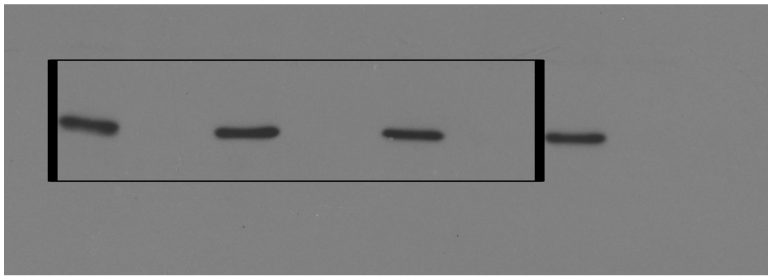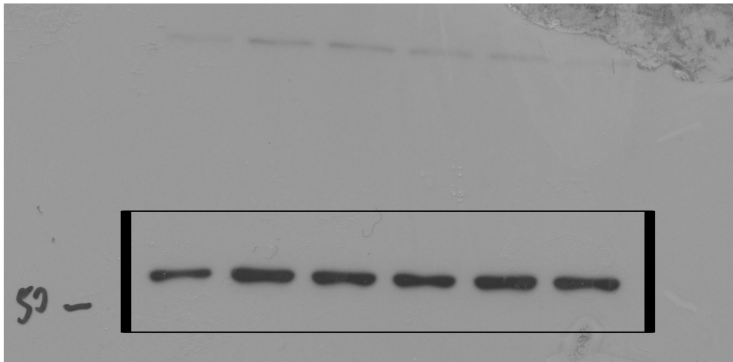

Supplementary  
Fig. 5

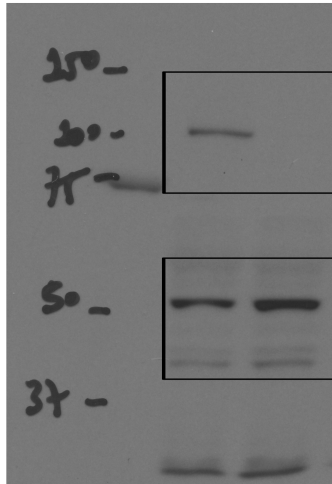

Suppl. Table 1. *Drosophila* stocks used in this study.

| Name                                                                       | Genotype                                                                                                                       | Description                                                                                                                                                   | Source/<br>Reference         |
|----------------------------------------------------------------------------|--------------------------------------------------------------------------------------------------------------------------------|---------------------------------------------------------------------------------------------------------------------------------------------------------------|------------------------------|
| Oregon R (OR)                                                              |                                                                                                                                | Wild type stock.                                                                                                                                              |                              |
| Nubbin-Gal4                                                                | y, w <sup>1118</sup> ; P{w <sup>+</sup> , nubbin-GAL4}                                                                         | Contains the Nubbin-Gal4 driver for specific expression in the pouch of wing imaginal disc.                                                                   | BDSC                         |
| UAS-San RNAi                                                               | y w <sup>1118</sup> ; P{KK101696, y <sup>+</sup> , w <sup>3</sup> }                                                            | Contains a dsRNA under UAS control for RNAi of san.                                                                                                           | VDRC                         |
| UAS-mCherry RNAi                                                           | y <sup>1</sup> sc <sup>*</sup> v <sup>1</sup> ; P{y <sup>+7.7</sup> v <sup>+1.8</sup> =VALIUM20-mCherry}attP2                  | Contains a dsRNA under UAS control for RNAi of mCherry.                                                                                                       | BDSC/TRiP                    |
| UAS-deco RNAi                                                              | y <sup>1</sup> sc <sup>*</sup> v <sup>1</sup> ; P{y <sup>+7.7</sup> v <sup>+1.8</sup> =TRiP.GL00528}attP2                      | Contains a dsRNA under UAS control for RNAi of deco.                                                                                                          | BDSC/TRiP                    |
| UAS-vtd RNAi                                                               | y <sup>1</sup> sc <sup>*</sup> v <sup>1</sup> ; P{y <sup>+7.7</sup> v <sup>+1.8</sup> =TRiP.GL00522}attP2/TM3, Sb <sup>1</sup> | Contains a dsRNA under UAS control for RNAi of vtd/scc1.                                                                                                      | BDSC/TRiP                    |
| UAS-mau-2 RNAi                                                             | y <sup>1</sup> sc <sup>*</sup> v <sup>1</sup> ; P{y <sup>+7.7</sup> v <sup>+1.8</sup> =TRiP.HMS02374}attP2                     | Contains a dsRNA under UAS control for RNAi of mau-2.                                                                                                         | BDSC/TRiP                    |
| UAS-Smc3-Scc1-fusion                                                       | UAS-Smc3-Scc1-GFP fusion                                                                                                       | Contains smc3 c-terminally fused with the N-terminus of vtd/scc1 under UAS control.                                                                           | (Eichinger et al., 2013)     |
| UAS-dmt                                                                    | w <sup>1118</sup> ; P{w <sup>+</sup> , UAS-Dmt}                                                                                | Contains dmt/soronin under UAS control.                                                                                                                       | (Kerman and Andrew, 2010)    |
| dmt <sup>1184</sup>                                                        | dmt <sup>1184</sup> /Tm3                                                                                                       | Carries a loss of function allele of dmt/soronin.                                                                                                             | (Kerman and Andrew, 2010)    |
| Nubbin-Gal4<br>UAS-san RNAi                                                | w <sup>1118</sup> ; P{w <sup>+</sup> , nubbin-GAL4}, P{KK101696, y <sup>+</sup> , w <sup>3</sup> }/CyO                         | Contains the Nubbin-Gal4 driver and a dsRNA under UAS control for RNAi of san.                                                                                | This study                   |
| san <sup>3</sup>                                                           | w/w; FRT42B B16-79/ CyO                                                                                                        | Loss of function allele of san.                                                                                                                               | Pimenta-Marques et al., 2008 |
| san <sup>4</sup>                                                           | w/w; FRT42B B50-26/ CyO                                                                                                        | Loss of function allele of san.                                                                                                                               | Pimenta-Marques et al., 2008 |
| Wild type san genomic construct in san <sup>4</sup> background             | w/w; FRT42B B50-26/ CyO; P{w <sup>+</sup> =WALIUM22-San}attP2/TM6B                                                             | Carries a loss of function allele san <sup>4</sup> and a genomic construct that expresses a wild type Naa50/San under the control of its endogenous promoter. | This study                   |
| san <sup>R84A Y124F</sup> genomic construct in san <sup>4</sup> background | w/w; FRT42B B50-26/ CyO; P{w <sup>+</sup> =WALIUM22-S san <sup>R84A Y124F</sup> }attP2/TM6B                                    | Carries the loss of function allele san <sup>4</sup> and expresses san <sup>R84A Y124F</sup> under control of the endogenous promoter.                        | This study                   |

BDSC - Bloomington Drosophila Stock Center; VDRC - Vienna Drosophila RNAi Center; TRiP - Transgenic RNAi Project.

Suppl. Table 2 – Complete list of primers used in this study.

| Complete list of primers |                                                                   |                                                                                                                                        |
|--------------------------|-------------------------------------------------------------------|----------------------------------------------------------------------------------------------------------------------------------------|
| Primer name              | Primer sequence                                                   | Comment                                                                                                                                |
| san RNAi Fw              | TAATACGACTCACTATAGGGAGAA<br>GCAGCATCGAACTGGGC                     | For san (CG12352) siRNA                                                                                                                |
| san RNAi Rv              | TAATACGACTCACTATAGGGAGAC<br>GCTTATAGTATTGCTCCTTGGT                | For san (CG12352) siRNA                                                                                                                |
| sanAmp2 RNAi Fw          | TAATACGACTCACTATAGGGAG<br>ACAACACTGAGAACCAGCGGC                   | For san (CG12352) siRNA second amplicon                                                                                                |
| sanAmp2 RNAi Rv          | TAATACGACTCACTATAGGGAGAC<br>GTAGTAAAGCACGACAGTTCAC                | For san (CG12352) siRNA second amplicon                                                                                                |
| deco RNAi Fw             | GGATCCTAATACGACTCACTA<br>TACGCTGGCCCGGATGTT                       | For deco (CG8598) siRNA                                                                                                                |
| deco RNAi Rv             | GGATCCTAATACGACTCACTATAC<br>AACCTCCCGTCCACTATT                    | For deco (CG8598) siRNA                                                                                                                |
| gfp RNAi Fw              | TAATACGACTCACTATAGGGAGAC<br>TTCAGCCGCTACCCC                       | For control siRNA                                                                                                                      |
| gfp RNAi Rv              | TAATACGACTCACTATAGGGAGAT<br>GTCGGGCAGCACG                         | For control siRNA                                                                                                                      |
| Sccl(Wt) Fw              | GGGGACAAGTTTGTACAAAAAAGC<br>AGGCTAAATGTTCTATGAGCACAT<br>TATTTTGGC | For attB PCR to allow expression of native <i>Drosophila</i> Sccl (CG17436) in pDONR221.                                               |
| Sccl(MP-) Fw             | GGGGACAAGTTTGTACAAAAAAGC<br>AGGCTAAATGCCCTATGAGCACAT<br>TATTTTGGC | For attB PCR to allow expression of native <i>Drosophila</i> Sccl (CG17436) with a proline residue after the methionine in pDONR221.   |
| Sccl(ME-) Fw             | GGGGACAAGTTTGTACAAAAAAGC<br>AGGCTAAATGGAGTATGAGCACAT<br>TATTTTGGC | For attB PCR to allow expression of native <i>Drosophila</i> Sccl (CG17436) with a glutamate residue after the methionine in pDONR221. |
| Sccl Rv                  | GGGGACCACTTTGTACAAGAAAGC<br>TGGGTCTTAAATTTTTGGGTTTTTCG            | For attB PCR to allow expression of <i>Drosophila</i> Sccl (CG17436) in pDONR221.                                                      |
| a371t_Rv                 | CGAAACCAAACCTTCTTAAAGAACT<br>CGATGGCTCCG                          | To generate pETM41-san <sup>R84A, Y124F</sup> mutant plasmid with pETM41-san plasmid as template                                       |
| a371t                    | CGGAGCCATCGAGTTCTTTAAGAA<br>GTTTGGTTTTCG                          | To generate pETM41-san <sup>R84A, Y124F</sup> mutant plasmid with pETM41-san plasmid as template                                       |
| c250g_g251c_rev          | GATGCCAGGCGCGCTACGGGGA<br>GAGG                                    | To generate pETM41-san <sup>R84A, Y124F</sup> mutant plasmid with pETM41-san plasmid as template                                       |
| c250g_g251c              | CCTCTCCCCGTACGCGCCTGGGC<br>ATC                                    | To generate pETM41-san <sup>R84A, Y124F</sup> mutant plasmid with pETM41-san plasmid as template                                       |

Suppl. Table 3 – Adult *Drosophila* zygotic viability

| cross                                                                                   | Total number of F1 flies (n) |                        | Cy+             | Cy        |
|-----------------------------------------------------------------------------------------|------------------------------|------------------------|-----------------|-----------|
| $\frac{w}{w} ; \frac{san^4}{CyO} ; \frac{san \text{ genomic}^{Wt}}{MKRS}$               | n = 173                      | <i>Sb</i> <sup>+</sup> | <b>48 (28%)</b> | 125 (72%) |
| $\frac{w}{\text{>}} ; \frac{san^3}{CyO} ; \frac{+}{+}$                                  | n = 97                       | <i>Sb</i>              | 0 (0%)          | 97 (100%) |
| $\frac{w}{w} ; \frac{san^3}{CyO} ; \frac{+}{+}$                                         | n = 155                      | <i>Tb</i> <sup>+</sup> | <b>47 (30%)</b> | 108 (70%) |
| $\frac{w}{\text{>}} ; \frac{san^4}{CyO} ; \frac{san \text{ genomic}^{Wt}}{TM6B}$        | n = 77                       | <i>Tb</i>              | 0 (0%)          | 77 (100%) |
| $\frac{w}{w} ; \frac{san^4}{CyO} ; \frac{san \text{ genomic}^{R84AY124F}}{TM6B}$        | n = 84                       | <i>Tb</i> <sup>+</sup> | <b>0 (0%)</b>   | 84 (100%) |
| $\frac{w}{\text{>}} ; \frac{san^3}{CyO} ; \frac{+}{+}$                                  | n = 43                       | <i>Tb</i>              | 0 (0%)          | 43 (100%) |
| $\frac{w}{w} ; \frac{san^3}{CyO} ; \frac{+}{+}$                                         | n = 64                       | <i>Tb</i> <sup>+</sup> | <b>0 (0%)</b>   | 64 (100%) |
| $\frac{w}{\text{>}} ; \frac{san^4}{CyO} ; \frac{san \text{ genomic}^{R84AY124F}}{TM6B}$ | n = 77                       | <i>Tb</i>              | 0 (0%)          | 77 (100%) |





**Supplementary Figure 1. Examples of the scored adult wing phenotypic classes.** Class 1 only includes flies with wild type wings, class 2 includes flies with weak wing phenotype, class 3 includes flies with *san* RNAi-like wing phenotype, class 4 includes highly abnormal wings and class 5 only includes flies with absent or vestigial adult wings.

**Supplementary Figure 2. Naa50/San is required for chromosomal localization of Scc1 in *Drosophila* S2 cells.**

Scc1 association to chromosomes, but not its protein stability, is impaired after depletion of Naa50/San (**A-D**). Representative images of *Drosophila* S2 cells analyzed 96 hours after control RNAi (**A**) or *san* RNAi (**B**). S2 cells were stained for DNA (blue), Scc1 (red) and  $\alpha$ -Tubulin (green). Scc1 colocalized with DNA during prometaphase/metaphase in control RNAi-treated cells (**A**), but not in *san* RNAi-treated cells (**B**). (**C**) Western blot of total protein extracts from *san* RNAi-treated S2 cells and embryos mutant for *san* (maternal mutants) showed no clear reduction of Scc1 and Smc1 protein levels.  $\alpha$ -Tubulin was used as a loading control. (**D**) Quantification of Scc1 mislocalization phenotype during prometaphase/metaphase after depletion of Naa50/San. Reduced colocalization between Scc1 and DNA: control RNAi-treated S2 cells (0%, n=20), *san* RNAi-treated S2 cells 86.9 %  $\pm$  10.2 (n=26). Scale bars equal 5  $\mu$ m.

**Supplementary Figure 3. Naa50/San is efficiently depleted by *san* RNAi-treatment in *Drosophila* S2 cells. Absence of Naa50/San in embryos mutant for *san* (maternal mutants). Naa50/San expression levels are identical for a wild type ( $\text{San}^{\text{wt}}$ ) and a catalytically dead-version ( $\text{San}^{\text{R84A Y124F}}$ ). Levels of Scc1 after ectopic expression of Scc1MF (wild-type) or Scc1MP are equivalent.**

(**A**) Western blot analysis of total protein extracts from *Drosophila* S2 cells treated with *san* RNAi for 72 hours (left) and 96 hours (right), showed reduced levels of Naa50/San protein when compared with control RNAi-treated cells. Depletion of Naa50/San was more efficient 96 hours after *san* RNAi-treatment.

$\alpha$ -Tubulin was used as loading control. **(B)** Wild type and catalytically dead genomic constructs expressed similar levels of Naa50/San. Western blot analysis of total protein extracts from *san* mutant embryos with one copy of a wild type genomic construct (*san*<sup>wt</sup>), and *san* mutant embryos with one copy of a catalytically dead genomic construct (*san*<sup>R84A Y124F</sup>).  $\alpha$ -Tubulin was used as loading control. *san* mutant embryos (maternal mutants) were obtained after the induction of germ line clones using the FRT/*ovo*<sup>D</sup> system{Chou, 1992 #67} and a previously published loss-of-function allele of *san* (*san*<sup>3</sup>){Pimenta-Marques, 2008 #5}. Both wild type (*san*<sup>wt</sup>) and catalytically dead genomic constructs (*san*<sup>R84A Y124F</sup>) contain the gene endogenous promoter and were integrated in the same attP2 site (for more details see material and methods). <sup>1</sup> and <sup>2</sup> indicate that the genomic constructs although identical are from two independently generated *Drosophila* stocks. **(C)** Western blot analysis of total protein extracts from control RNAi and *san* RNAi-treated S2 cells, transfected with an empty plasmid (pHW), wild type Scc1 (Scc1Wt), or a non acetyltable mutant Scc1 (Scc1MP), showed identical levels of Scc1. There were no reproducible variations of Scc1 protein levels for any of the tested mutant alleles. A reduction in Naa50/San protein levels was always observed in *san* RNAi-treated cells.  $\alpha$ -Tubulin was used as loading control. **(D)** Representation of the different Scc1 constructs used: a NatE (Naa50/San)-like substrate (Wild-type Scc1; Scc1Wt), a NatB-like substrate Scc1 (Scc1ME mutant variant), and a non-acetyltable mutant Scc1 (Scc1MP mutant variant).

**Supplementary Figure 4. Naa50/San is not enriched in the nucleus of *Drosophila* S2 cells. (A and B).** Representative images of *Drosophila* S2 cells analyzed 96 hours after control RNAi **(A)** or *san* RNAi **(B)**. S2 cells were stained for DNA (blue) and San (red). San is not enriched in the nucleus during interphase **(A)**{Williams, 2003 #4; Aksnes, 2015 #200}. In *san* RNAi-treated cells there is, as expected, a reduction of San protein levels which confirms signal specificity **(B)**. Scale bars equal 5  $\mu$ m.

**Supplementary Figure 5. Scc1 antibody is specific for Scc1 protein. (A)**

Western blot analysis of total protein extracts from *Drosophila* S2 cells treated with control RNAi (left) or *scc1* RNAi for 96 hours (right). *scc1*-RNAi treated cells showed reduced levels of Scc1 protein when compared with control RNAi-treated cells.  $\alpha$ -Tubulin was used as loading control.

**Supplementary Figure 6. The mitotic index of cells treated with colchicine is significantly increased.**

Mitotic index (% of phospho-H3 (pSer10) positive cells) for control RNAi and *san* RNAi-treated cells (96 hours after RNAi-treatment) transfected with an empty plasmid or a GFP-tagged Smc3 was, respectively, 5.6%  $\pm$  0.6 (n=358), 19.9%  $\pm$  4.2 (n=335), 11.7%  $\pm$  3.6 (n=274) and 13.2%  $\pm$  1.3 (n=270). The mitotic index for control RNAi and *san* RNAi-treated cells transfected with an empty plasmid or a GFP-tagged Smc3 and treated with 25 $\mu$ M of colchicine for 12 hours was, respectively, 34.3%  $\pm$  5.9 (n=173), 38.8%  $\pm$  5.5 (n=228), 34.9%  $\pm$  2.2 (n=133) and 42.1%  $\pm$  1.7 (n=152).

**Supplementary Figure 7. Uncropped images of all protein blots shown in this manuscript.**

**Supplementary Table 1. *Drosophila* stocks used in this study.**

**Supplementary Table 2. Complete list of primers used in this study.**

**Supplementary Table 3. Naa50/San catalytic activity is essential for adult *Drosophila* viability.**

A genomic construct carrying a wild type copy of *san* (*san*<sup>Wt</sup>), but not a catalytically dead allele of *san* (*san*<sup>R84A Y124F</sup>), efficiently rescued the zygotic lethality of two loss-of-function alleles of *san* (*san*<sup>3</sup> and *san*<sup>4</sup>){Pimenta-Marques, 2008 #5}. Given the indicated crosses, and since *Drosophila* flies homozygous for the CyO balancers are not viable, full complementation of *san* mutant viability corresponds to 33% of the total number of progeny (F1) *Drosophila* flies with the genomic transgene.

**Supplementary Table 4. Detailed LC-MS analysis of endogenous Scc1 and Scc1-Myc tagged co-immunoprecipitation assays.**

All subunits of the cohesin complex, but not Dalmatian/Soronin, were efficiently immunoprecipitated with endogenous Scc1 **(A)** or with Myc-tagged Scc1 **(B)** after depletion of Naa50/San. Co-immunoprecipitations with an anti-Scc1 antibody or with anti-c-Myc Magnetic beads (Invitrogen, Grand Island, NY, USA) were performed, respectively, using total protein extracts from *Drosophila* S2 cells or expressing a Myc-tagged Scc1. Both sets of cells were either treated with control RNAi or *san* RNAi before immunoprecipitation. Score, number of detected peptides (matches) and non-repeated peptides (sequences) for each immunoprecipitated protein is indicated. None of the proteins shown in this table were detected in the negative controls (respectively, **(A)** pre-immune serum or **(B)** *Drosophila* S2 cells expressing an empty plasmid). Two biological replicas (Rep1 and Rep2) are shown for each experimental condition.

**Movie S1. Control S2 cells (96h RNAi treatment), GFP-Histone H2B (green) and  $\alpha$ -Tubulin-mCherry (red).**

Time-Lapse microscopy of S2 cells stably expressing GFP-Histone H2B (green) and  $\alpha$ -Tubulin-mCherry (red) after 96 hours of control RNAi treatment. For more experimental details please see methods.

**Movie S2. San depleted S2 cells (96h RNAi treatment), GFP-Histone H2B (green) and  $\alpha$ -Tubulin-mCherry (red).**

Time-Lapse microscopy of S2 cells stably expressing GFP-Histone H2B (green) and  $\alpha$ -Tubulin-mCherry (red) after 96 hours of *san* RNAi treatment. For more experimental details please see methods. The arrowhead is labeling a single chromatid at the different time points.

**Movie S3. San depleted S2 cells (96h RNAi treatment), GFP-Histone H2B (green) and  $\alpha$ -Tubulin-mCherry (red).**

Time-Lapse microscopy of S2 cells stably expressing GFP-Histone H2B (green) and  $\alpha$ -Tubulin-mCherry (red) after 96 hours of *san* RNAi treatment. For more experimental details please see methods. The arrowhead is labeling a single chromatid at the different time points.

**Movie S4. San depleted S2 cells (96h RNAi treatment), GFP-Histone H2B (green) and  $\alpha$ -Tubulin-mCherry (red), using a distinct non-overlapping dsRNA.**

Time-Lapse microscopy of S2 cells stably expressing GFP-Histone H2B (green) and  $\alpha$ -Tubulin-mCherry (red) after 96 hours of *san* RNAi treatment with a non-overlapping dsRNA. For more experimental details please see methods. The arrowhead is labeling a single chromatid at the different time points.

**Movie S5. Control S2 cells (96h RNAi treatment), GFP- $\alpha$ -Tubulin (green) and CID-mCherry (red).** Time-Lapse microscopy of S2 cells stably expressing GFP- $\alpha$ -Tubulin (green) and CID-mCherry (red) after 96 hours of control RNAi treatment. For more experimental details please see methods.

**Movie S6. San depleted S2 cells (96h RNAi treatment), GFP- $\alpha$ -Tubulin (green) and CID-mCherry (red).** Time-Lapse microscopy of S2 cells stably expressing GFP- $\alpha$ -Tubulin (green) and CID-mCherry (red) after 96 hours of *san* RNAi treatment. For more experimental details please see methods. The arrowhead is labeling a single chromatid at the different time points.

**Movie S7. Control S2 cells (72h RNAi treatment), GFP-Histone H2B (green) and  $\alpha$ -Tubulin-mCherry (red).**

Time-Lapse microscopy of S2 cells stably expressing GFP-Histone H2B (green) and  $\alpha$ -Tubulin-mCherry (red) after 72 hours of control RNAi treatment. For more experimental details please see methods.

**Movie S8. Deco depleted S2 cells (72h RNAi treatment), GFP-Histone H2B (green) and  $\alpha$ -Tubulin-mCherry (red).** Time-Lapse microscopy of S2 cells stably expressing GFP-Histone H2B (green) and  $\alpha$ -Tubulin-mCherry (red) after 72 hours of *deco* RNAi treatment. For more experimental details please see methods.

**Movie S9. San depleted S2 cells (72h RNAi treatment), GFP-Histone H2B (green) and  $\alpha$ -Tubulin-mCherry (red).** Time-Lapse microscopy of S2 cells stably expressing GFP-Histone H2B (green) and  $\alpha$ -Tubulin-mCherry (red) after 72 hours of *san* RNAi treatment. For more experimental details please see methods.

**Movie S10. San and Deco co-depleted S2 cells (72h RNAi treatment), GFP-Histone H2B (green) and  $\alpha$ -Tubulin-mCherry (red).** Time-Lapse microscopy of S2 cells stably expressing GFP-Histone H2B (green) and  $\alpha$ -Tubulin-mCherry (red) after 72 hours of *san* and *deco* RNAi co-treatment. For more experimental details please see methods. The arrowhead is labeling a single chromatid at the different time points.

**Movie S11. Control S2 cells, GFP-Histone H2B (green) and  $\alpha$ -Tubulin-mCherry (red), transfected with pHW.**

Time-Lapse microscopy of S2 cells stably expressing GFP-Histone H2B (green) and  $\alpha$ -Tubulin-mCherry (red), transfected with pHW (empty plasmid), and treated with control RNAi for 96 hours. For more experimental details please see methods.

**Movie S12. San depleted S2 cells, GFP-Histone H2B (green) and  $\alpha$ -Tubulin-mCherry (red), transfected with pHW.**

Time-Lapse microscopy of S2 cells stably expressing GFP-Histone H2B (green) and  $\alpha$ -Tubulin-mCherry (red), transfected with pHW (empty plasmid), and treated with *san* RNAi for 96 hours. For more experimental details please

see methods. The arrowhead is labeling a single chromatid at the different time points.

**Movie S13. Control S2 cells, GFP-Histone H2B (green) and  $\alpha$ -Tubulin-mCherry (red), transfected with pHW(Scc1Wt).** Time-Lapse microscopy of S2 cells stably expressing GFP-Histone H2B (green) and  $\alpha$ -Tubulin-mCherry (red), transfected with Scc1Wt, and treated with control RNAi for 96 hours. For more experimental details please see methods.

**Movie S14. San depleted S2 cells, GFP-Histone H2B (green) and  $\alpha$ -Tubulin-mCherry (red), transfected with pHW(Scc1Wt).** Time-Lapse microscopy of S2 cells stably expressing GFP-Histone H2B (green) and  $\alpha$ -Tubulin-mCherry (red), transfected with Scc1Wt, and treated with *san* RNAi for 96 hours. For more experimental details please see methods.

**Movie S15. Control S2 cells, GFP-Histone H2B (green) and  $\alpha$ -Tubulin-mCherry (red), transfected with pHW(Scc1MP).** Time-Lapse microscopy of S2 cells stably expressing GFP-Histone H2B (green) and  $\alpha$ -Tubulin-mCherry (red), transfected with Scc1MP, and treated with control RNAi for 96 hours. For more experimental details please see methods. The arrowhead is labeling a single chromatid at the different time points.

**Movie S16. San depleted S2 cells, GFP-Histone H2B (green) and  $\alpha$ -Tubulin-mCherry (red), transfected with pHW(Scc1MP).** Time-Lapse microscopy of S2 cells stably expressing GFP-Histone H2B (green) and  $\alpha$ -Tubulin-mCherry (red), transfected with Scc1MP, and treated with *san* RNAi for 96 hours. For more experimental details please see methods. The arrowhead is labeling a single chromatid at the different time points.
